# Supplementary material for: An Arctic sea ice concentration data record on a 6.25 km polar stereographic grid from 3 years of Landsat-8 imagery
Source: Copernicus journal article supplement (doi:10.5194/essd-17-233-2025), 2025-01-27
Supplement: Supplementary file 1 [file essd-17-233-2025-supplement.pdf]

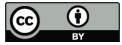

*Supplement of*

## **An Arctic sea ice concentration data record on a 6.25 km polar stereographic grid from 3 years of Landsat-8 imagery**

**Hee-Sung Jung et al.**

*Correspondence to:* Sang-Moo Lee ([sangmoolee@snu.ac.kr](mailto:sangmoolee@snu.ac.kr))

The copyright of individual parts of the supplement might differ from the article licence.

### S1 Number of available Landsat-8 images subject to varying cloud cover thresholds

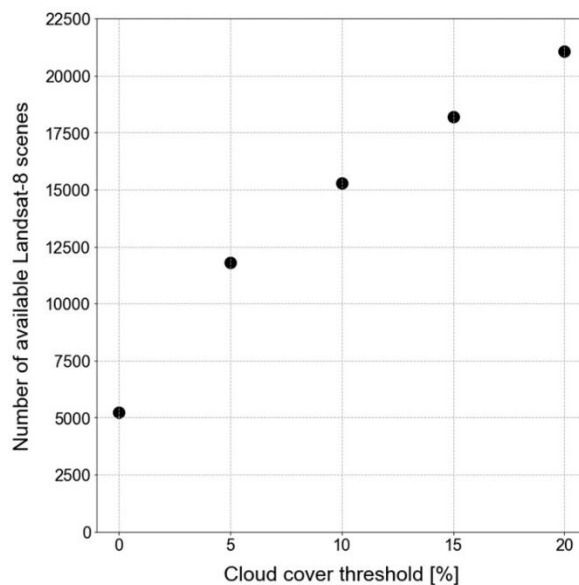

**Figure S1: Number of available Landsat-8 images (y-axis) subject to values of different cloud cover thresholds (x-axis) during the period of Jan. 2020 – Dec. 2022 over pan-Arctic areas.**

5

| Cloud cover threshold [%]            | 0     | 5      | 10     | 15     | 20     |
|--------------------------------------|-------|--------|--------|--------|--------|
| Number of available Landsat-8 scenes | 5,231 | 11,787 | 15,286 | 18,177 | 21,060 |

**Table S1: Number of available Landsat-8 images subject to values of different cloud cover thresholds during the period of Jan. 2020 – Dec. 2022 over pan-Arctic areas.**

10 S2 Evaluation of Ice And Open Water Classification Over Clear Pixels

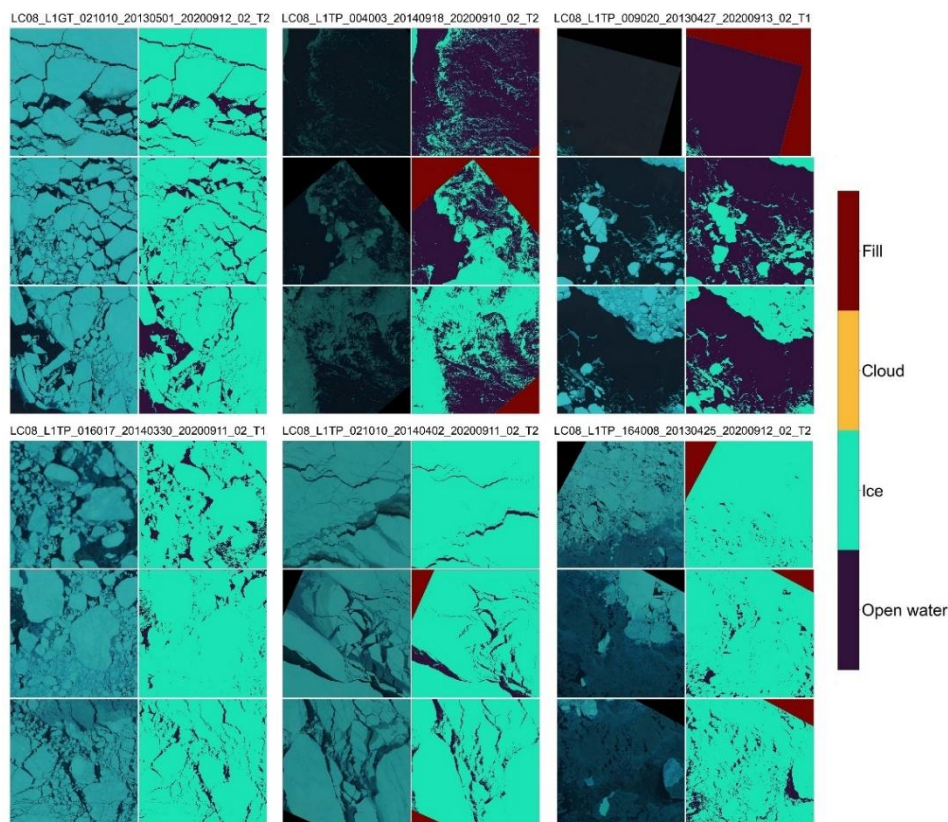

Figure S2: Sub-sections of the 6 scenes used for the test of ice and open water classification over clear pixels. True-color images (left of each panel) and the reference classification map that our method produced (right of each panel) are provided. Each pixel in the scene belong to open water (dark purple), ice (mint), or cloud (yellow). Red colour indicates the fill values. The true-color images were downloaded from United States Geological Survey Earth Explorer (<https://earthexplorer.usgs.gov/>, last access: May 22, 2024).

15

| Year | Filename                                 |
|------|------------------------------------------|
| 2013 | LC08_L1GT_021010_20130501_20200912_02_T2 |
|      | LC08_L1TP_009020_20130427_20200913_02_T1 |
|      | LC08_L1TP_164008_20130425_20200912_02_T2 |
| 2014 | LC08_L1TP_004003_20140918_20200910_02_T2 |
|      | LC08_L1TP_016017_20140330_20200911_02_T1 |
|      | LC08_L1TP_021010_20140402_20200911_02_T2 |

Table S2: List of Landsat-8 scenes used to test the performance of ice and open water classification over clear pixels.

20 S3 Evaluation of Landsat-8 SIC Using Ice Chart

| Cloud contamination label | Region                                   | Filename (Landsat)                       | Filename (Ice chart)              | Time Difference [sec] |
|---------------------------|------------------------------------------|------------------------------------------|-----------------------------------|-----------------------|
| C1                        | Barents_Sea                              | LC08_L1TP_221244_20210430_20210508_02_T2 | ice_conc_svalbard_202104301500.nc | 1397                  |
|                           | Barents_Sea                              | LC08_L1TP_226243_20210503_20210508_02_T2 | ice_conc_svalbard_202105031500.nc | 3225                  |
|                           | Barents_Sea                              | LC08_L1GT_222242_20210507_20210517_02_T2 | ice_conc_svalbard_202105071500.nc | 1717                  |
|                           | Barents_Sea                              | LC08_L1TP_214243_20210803_20210811_02_T1 | ice_conc_svalbard_202108031500.nc | -1191                 |
|                           | Barents_Sea                              | LC08_L1TP_221242_20210804_20210811_02_T1 | ice_conc_svalbard_202108041500.nc | 1381                  |
|                           | Barents_Sea                              | LC08_L1TP_214245_20220518_20220525_02_T2 | ice_conc_svalbard_202205181500.nc | -1151                 |
|                           | Barents_Sea                              | LC08_L1TP_225243_20220718_20220726_02_T1 | ice_conc_svalbard_202207181500.nc | 2899                  |
|                           | East_Greenland_Sea                       | LC08_L1TP_229012_20210305_20210312_02_T1 | ice_conc_svalbard_202103051500.nc | -1164                 |
|                           | East_Greenland_Sea                       | LC08_L1TP_225011_20210309_20210317_02_T1 | ice_conc_svalbard_202103091500.nc | -2673                 |
|                           | East_Greenland_Sea                       | LC08_L1TP_224011_20210318_20210328_02_T2 | ice_conc_svalbard_202103181500.nc | -3049                 |
|                           | East_Greenland_Sea                       | LC08_L1TP_227011_20210323_20210402_02_T1 | ice_conc_svalbard_202103231500.nc | -1937                 |
|                           | East_Greenland_Sea                       | LC08_L1TP_225010_20210325_20210402_02_T2 | ice_conc_svalbard_202103251500.nc | -2703                 |
|                           | East_Greenland_Sea                       | LC08_L1TP_003005_20210407_20210415_02_T1 | ice_conc_svalbard_202104071500.nc | 1253                  |
|                           | East_Greenland_Sea                       | LC08_L1TP_227008_20210408_20210416_02_T2 | ice_conc_svalbard_202104081500.nc | -2013                 |
|                           | East_Greenland_Sea                       | LC08_L1TP_001004_20210409_20210416_02_T2 | ice_conc_svalbard_202104091500.nc | 486                   |
|                           | East_Greenland_Sea                       | LC08_L1TP_006004_20210412_20210423_02_T1 | ice_conc_svalbard_202104211500.nc | 2339                  |
|                           | East_Greenland_Sea                       | LC08_L1TP_230006_20210413_20210423_02_T1 | ice_conc_svalbard_202104131500.nc | -951                  |
|                           | East_Greenland_Sea                       | LC08_L1TP_004004_20210414_20210423_02_T2 | ice_conc_svalbard_202104141500.nc | 1597                  |
|                           | East_Greenland_Sea                       | LC08_L1TP_228007_20210415_20210424_02_T1 | ice_conc_svalbard_202104151500.nc | -1669                 |
|                           | East_Greenland_Sea                       | LC08_L1TP_005004_20210421_20210430_02_T1 | ice_conc_svalbard_202104211500.nc | 1964                  |
|                           | East_Greenland_Sea                       | LC08_L1TP_008003_20210426_20210501_02_T1 | ice_conc_svalbard_202104261500.nc | 3050                  |
|                           | East_Greenland_Sea                       | LC08_L1TP_004003_20210430_20210508_02_T1 | ice_conc_svalbard_202104301500.nc | 1564                  |
|                           | East_Greenland_Sea                       | LC08_L1TP_007004_20210505_20210517_02_T1 | ice_conc_svalbard_202105051500.nc | 2697                  |
|                           | East_Greenland_Sea                       | LC08_L1TP_005004_20210507_20210517_02_T1 | ice_conc_svalbard_202105071500.nc | 1955                  |
|                           | East_Greenland_Sea                       | LC08_L1TP_225011_20210512_20210524_02_T1 | ice_conc_svalbard_202105121500.nc | -2695                 |
|                           | East_Greenland_Sea                       | LC08_L1TP_002004_20210518_20210528_02_T1 | ice_conc_svalbard_202105181500.nc | 851                   |
|                           | East_Greenland_Sea                       | LC08_L1TP_226011_20210519_20210528_02_T1 | ice_conc_svalbard_202105191500.nc | -2319                 |
|                           | East_Greenland_Sea                       | LC08_L1TP_233006_20210520_20210528_02_T1 | ice_conc_svalbard_202105201500.nc | 158                   |
|                           | East_Greenland_Sea                       | LC08_L1TP_003005_20210525_20210529_02_T1 | ice_conc_svalbard_202105251500.nc | 1249                  |
|                           | East_Greenland_Sea                       | LC08_L1TP_002005_20210603_20210614_02_T1 | ice_conc_svalbard_202106031500.nc | 883                   |
|                           | East_Greenland_Sea                       | LC08_L1TP_009003_20210604_20210614_02_T1 | ice_conc_svalbard_202106041500.nc | 3431                  |
|                           | East_Greenland_Sea                       | LC08_L1TP_230006_20210616_20210622_02_T1 | ice_conc_svalbard_202106161500.nc | -943                  |
|                           | East_Greenland_Sea                       | LC08_L1TP_001004_20210628_20210707_02_T1 | ice_conc_svalbard_202106281500.nc | 496                   |
|                           | East_Greenland_Sea                       | LC08_L1TP_003005_20210712_20210720_02_T1 | ice_conc_svalbard_202107121500.nc | 1262                  |
|                           | East_Greenland_Sea                       | LC08_L1TP_001006_20210714_20210721_02_T1 | ice_conc_svalbard_202107141500.nc | 545                   |
|                           | East_Greenland_Sea                       | LC08_L1TP_005004_20210726_20210804_02_T1 | ice_conc_svalbard_202107261500.nc | 1987                  |
|                           | East_Greenland_Sea                       | LC08_L1TP_003004_20210728_20210804_02_T1 | ice_conc_svalbard_202107281500.nc | 1246                  |
|                           | East_Greenland_Sea                       | LC08_L1TP_007004_20210809_20210819_02_T1 | ice_conc_svalbard_202108091500.nc | 2734                  |
|                           | East_Greenland_Sea                       | LC08_L1TP_225010_20210816_20210826_02_T1 | ice_conc_svalbard_202108161500.nc | -2683                 |
|                           | East_Greenland_Sea                       | LC08_L1TP_232006_20210817_20210827_02_T1 | ice_conc_svalbard_202108171500.nc | -182                  |
|                           | East_Greenland_Sea                       | LC08_L1TP_006004_20210818_20210827_02_T1 | ice_conc_svalbard_202108181500.nc | 2366                  |
|                           | East_Greenland_Sea                       | LC08_L1TP_007004_20210825_20210901_02_T1 | ice_conc_svalbard_202108251500.nc | 2739                  |
|                           | East_Greenland_Sea                       | LC08_L1TP_227012_20210830_20210909_02_T1 | ice_conc_svalbard_202108301500.nc | -1889                 |
|                           | East_Greenland_Sea                       | LC08_L1TP_006003_20210903_20210910_02_T2 | ice_conc_svalbard_202109031500.nc | 2347                  |
|                           | East_Greenland_Sea                       | LC08_L1TP_226012_20210908_20210916_02_T1 | ice_conc_svalbard_202109081500.nc | -2257                 |
|                           | East_Greenland_Sea                       | LC08_L1TP_227011_20210915_20210925_02_T1 | ice_conc_svalbard_202109151500.nc | -1909                 |
|                           | East_Greenland_Sea                       | LC08_L1TP_001006_20220412_20220419_02_T1 | ice_conc_svalbard_202204121500.nc | 540                   |
|                           | East_Greenland_Sea                       | LC08_L1TP_225011_20220413_20220420_02_T2 | ice_conc_svalbard_202204131500.nc | -2677                 |
|                           | East_Greenland_Sea                       | LC08_L1TP_002005_20220419_20220427_02_T1 | ice_conc_svalbard_202204191500.nc | 886                   |
|                           | East_Greenland_Sea                       | LC08_L1TP_226009_20220420_20220427_02_T1 | ice_conc_svalbard_202204201500.nc | -2356                 |
| East_Greenland_Sea        | LC08_L1TP_233006_20220421_20220428_02_T1 | ice_conc_svalbard_202204211500.nc        | 168                               |                       |
| East_Greenland_Sea        | LC08_L1TP_007004_20220422_20220428_02_T1 | ice_conc_svalbard_202204221500.nc        | 2716                              |                       |
| East_Greenland_Sea        | LC08_L1TP_229007_20220425_20220503_02_T1 | ice_conc_svalbard_202204251500.nc        | -1293                             |                       |
| East_Greenland_Sea        | LC08_L1TP_003005_20220426_20220503_02_T1 | ice_conc_svalbard_202204261500.nc        | 1254                              |                       |
| East_Greenland_Sea        | LC08_L1TP_001005_20210916_20210925_02_T1 | ice_conc_svalbard_202109161500.nc        | 543                               |                       |
| East_Greenland_Sea        | LC08_L1TP_228012_20210922_20210930_02_T1 | ice_conc_svalbard_202109221500.nc        | -1514                             |                       |
| East_Greenland_Sea        | LC08_L1TP_227011_20211001_20211013_02_T1 | ice_conc_svalbard_202110011500.nc        | -1904                             |                       |

|    |                    |                                          |                                   |       |
|----|--------------------|------------------------------------------|-----------------------------------|-------|
|    | East_Greenland_Sea | LC08_L1TP_229012_20220324_20220330_02_T1 | ice_conc_svalbard_202203241500.nc | -1171 |
|    | East_Greenland_Sea | LC08_L1TP_232005_20220329_20220405_02_T2 | ice_conc_svalbard_202203291500.nc | -231  |
|    | East_Greenland_Sea | LC08_L1TP_006004_20220330_20220406_02_T1 | ice_conc_svalbard_202203301500.nc | 2341  |
|    | East_Greenland_Sea | LC08_L1TP_230008_20220331_20220406_02_T1 | ice_conc_svalbard_202203311500.nc | -901  |
|    | East_Greenland_Sea | LC08_L1TP_004004_20220401_20220411_02_T2 | ice_conc_svalbard_202204011500.nc | 1599  |
|    | East_Greenland_Sea | LC08_L1TP_226010_20220404_20220412_02_T1 | ice_conc_svalbard_202204041500.nc | -2335 |
|    | East_Greenland_Sea | LC08_L1TP_224010_20220406_20220412_02_T1 | ice_conc_svalbard_202204061500.nc | -3076 |
|    | East_Greenland_Sea | LC08_L1TP_231006_20220407_20220412_02_T1 | ice_conc_svalbard_202204071500.nc | -575  |
|    | East_Greenland_Sea | LC08_L1TP_005004_20220408_20220412_02_T2 | ice_conc_svalbard_202204081500.nc | 1974  |
|    | East_Greenland_Sea | LC08_L1TP_001004_20220428_20220503_02_T2 | ice_conc_svalbard_202204281500.nc | 488   |
|    | East_Greenland_Sea | LC08_L1TP_004003_20220503_20220511_02_T2 | ice_conc_svalbard_202205031500.nc | 1580  |
|    | East_Greenland_Sea | LC08_L1TP_231007_20220509_20220518_02_T1 | ice_conc_svalbard_202205091500.nc | -545  |
|    | East_Greenland_Sea | LC08_L1TP_005003_20220510_20220518_02_T2 | ice_conc_svalbard_202205101500.nc | 1956  |
|    | East_Greenland_Sea | LC08_L1TP_229006_20220511_20220519_02_T1 | ice_conc_svalbard_202205111500.nc | -1310 |
|    | East_Greenland_Sea | LC08_L1TP_003005_20220512_20220519_02_T1 | ice_conc_svalbard_202205121500.nc | 1262  |
|    | East_Greenland_Sea | LC08_L1TP_227012_20220513_20220519_02_T1 | ice_conc_svalbard_202205131500.nc | -1907 |
|    | East_Greenland_Sea | LC08_L1TP_230008_20220518_20220525_02_T1 | ice_conc_svalbard_202205181500.nc | -889  |
|    | East_Greenland_Sea | LC08_L1TP_230009_20220603_20220610_02_T1 | ice_conc_svalbard_202206031500.nc | -860  |
|    | East_Greenland_Sea | LC08_L1TP_226012_20220607_20220610_02_T1 | ice_conc_svalbard_202206071500.nc | -2268 |
|    | East_Greenland_Sea | LC08_L1TP_007004_20220609_20220616_02_T1 | ice_conc_svalbard_202206091500.nc | 2734  |
|    | East_Greenland_Sea | LC08_L1TP_231007_20220610_20220616_02_T1 | ice_conc_svalbard_202206101500.nc | -531  |
|    | East_Greenland_Sea | LC08_L1TP_008003_20220616_20220629_02_T1 | ice_conc_svalbard_202206161500.nc | 3086  |
|    | East_Greenland_Sea | LC08_L1TP_231006_20220712_20220722_02_T1 | ice_conc_svalbard_202207121500.nc | -549  |
|    | East_Greenland_Sea | LC08_L1TP_229012_20220714_20220726_02_T1 | ice_conc_svalbard_202207141500.nc | -1148 |
|    | East_Greenland_Sea | LC08_L1TP_003005_20220715_20220725_02_T1 | ice_conc_svalbard_202207151500.nc | 1281  |
|    | East_Greenland_Sea | LC08_L1TP_232006_20220804_20220818_02_T1 | ice_conc_svalbard_202208041500.nc | -164  |
|    | East_Greenland_Sea | LC08_L1TP_229012_20220815_20220824_02_T1 | ice_conc_svalbard_202208151500.nc | -1129 |
|    | East_Greenland_Sea | LC08_L1TP_227011_20220817_20220824_02_T1 | ice_conc_svalbard_202208171500.nc | -1894 |
|    | East_Greenland_Sea | LC08_L1TP_004003_20220823_20220923_02_T1 | ice_conc_svalbard_202208231500.nc | 1623  |
|    | East_Greenland_Sea | LC08_L1TP_230008_20220907_20220914_02_T1 | ice_conc_svalbard_202209071500.nc | -851  |
|    | Central_Arctic     | LC08_L1TP_221244_20210430_20210508_02_T2 | ice_conc_svalbard_202104301500.nc | 1397  |
|    | Central_Arctic     | LC08_L1TP_226243_20210503_20210508_02_T2 | ice_conc_svalbard_202105031500.nc | 3225  |
|    | Central_Arctic     | LC08_L1TP_214243_20210803_20210811_02_T1 | ice_conc_svalbard_202108031500.nc | -1191 |
|    | Central_Arctic     | LC08_L1TP_224002_20220406_20220412_02_T1 | ice_conc_svalbard_202204061500.nc | -3267 |
|    | Central_Arctic     | LC08_L1TP_226001_20220420_20220427_02_T2 | ice_conc_svalbard_202204201500.nc | -2546 |
|    | Central_Arctic     | LC08_L1GT_229001_20220425_20220503_02_T2 | ice_conc_svalbard_202204251500.nc | -1436 |
|    | Central_Arctic     | LC08_L1TP_214245_20220518_20220525_02_T2 | ice_conc_svalbard_202205181500.nc | -1151 |
|    | Central_Arctic     | LC08_L1TP_225243_20220718_20220726_02_T1 | ice_conc_svalbard_202207181500.nc | 2899  |
|    | Kara_Sea           | LC08_L1GT_222242_20210507_20210517_02_T2 | ice_conc_svalbard_202105071500.nc | 1717  |
|    | Kara_Sea           | LC08_L1TP_214243_20210803_20210811_02_T1 | ice_conc_svalbard_202108031500.nc | -1191 |
|    | Kara_Sea           | LC08_L1TP_212242_20210805_20210811_02_T1 | ice_conc_svalbard_202108051500.nc | -1956 |
|    | Kara_Sea           | LC08_L1TP_209242_20220803_20220806_02_T1 | ice_conc_svalbard_202208031500.nc | -3047 |
| C2 | East_Greenland_Sea | LC08_L1TP_228012_20210330_20210409_02_T1 | ice_conc_svalbard_202103301500.nc | -1544 |
|    | East_Greenland_Sea | LC08_L1TP_229007_20210406_20210415_02_T1 | ice_conc_svalbard_202104061500.nc | -1295 |
|    | East_Greenland_Sea | LC08_L1TP_227007_20220411_20220419_02_T1 | ice_conc_svalbard_202204111500.nc | -2032 |
|    | East_Greenland_Sea | LC08_L1TP_228008_20220317_20220322_02_T1 | ice_conc_svalbard_202203171500.nc | -1632 |
|    | East_Greenland_Sea | LC08_L1TP_229009_20220324_20220330_02_T1 | ice_conc_svalbard_202203241500.nc | -1243 |
|    | East_Greenland_Sea | LC08_L1TP_225011_20220328_20220405_02_T2 | ice_conc_svalbard_202203281500.nc | -2682 |
|    | East_Greenland_Sea | LC08_L1TP_230006_20220331_20220406_02_T2 | ice_conc_svalbard_202203311500.nc | -949  |
|    | East_Greenland_Sea | LC08_L1TP_009003_20220404_20220412_02_T1 | ice_conc_svalbard_202204041500.nc | 3431  |
| C3 | Barents_Sea        | LC08_L1TP_215245_20210607_20210615_02_T2 | ice_conc_svalbard_202106071500.nc | -790  |
|    | East_Greenland_Sea | LC08_L1TP_227010_20210323_20210402_02_T1 | ice_conc_svalbard_202103231500.nc | -1961 |
|    | East_Greenland_Sea | LC08_L1TP_227010_20210408_20210416_02_T1 | ice_conc_svalbard_202104081500.nc | -1966 |
|    | East_Greenland_Sea | LC08_L1TP_223014_20210412_20210423_02_T1 | ice_conc_svalbard_202104121500.nc | -3355 |
|    | East_Greenland_Sea | LC08_L1TP_230008_20210413_20210423_02_T1 | ice_conc_svalbard_202104131500.nc | -903  |
|    | East_Greenland_Sea | LC08_L1TP_003004_20210423_20210501_02_T1 | ice_conc_svalbard_202104231500.nc | 1221  |
|    | East_Greenland_Sea | LC08_L1TP_225010_20210426_20210501_02_T2 | ice_conc_svalbard_202104261500.nc | -2716 |
|    | East_Greenland_Sea | LC08_L1TP_006004_20210428_20210507_02_T1 | ice_conc_svalbard_202104281500.nc | 2331  |
|    | East_Greenland_Sea | LC08_L1TP_004004_20210430_20210508_02_T1 | ice_conc_svalbard_202104301500.nc | 1588  |
|    | East_Greenland_Sea | LC08_L1TP_001004_20210511_20210524_02_T1 | ice_conc_svalbard_202105111500.nc | 475   |
|    | East_Greenland_Sea | LC08_L1TP_225002_20210512_20210524_02_T1 | ice_conc_svalbard_202105121500.nc | -2909 |
|    | East_Greenland_Sea | LC08_L1TP_009002_20210519_20210528_02_T1 | ice_conc_svalbard_202105191500.nc | 3399  |
|    | East_Greenland_Sea | LC08_L1TP_227008_20210526_20210529_02_T1 | ice_conc_svalbard_202105261500.nc | -2016 |

|    |                    |                                          |                                   |       |
|----|--------------------|------------------------------------------|-----------------------------------|-------|
|    | East_Greenland_Sea | LC08_L1TP_001005_20210527_20210607_02_T1 | ice_conc_svalbard_202105271500.nc | 509   |
|    | East_Greenland_Sea | LC08_L1TP_225011_20210528_20210607_02_T1 | ice_conc_svalbard_202105281500.nc | -2685 |
|    | East_Greenland_Sea | LC08_L1TP_231008_20210607_20210615_02_T1 | ice_conc_svalbard_202106071500.nc | -527  |
|    | East_Greenland_Sea | LC08_L1TP_003004_20210610_20210621_02_T1 | ice_conc_svalbard_202106101500.nc | 1233  |
|    | East_Greenland_Sea | LC08_L1TP_223014_20210615_20210622_02_T1 | ice_conc_svalbard_202106151500.nc | -3347 |
|    | East_Greenland_Sea | LC08_L1TP_230007_20210616_20210622_02_T1 | ice_conc_svalbard_202106161500.nc | -919  |
|    | East_Greenland_Sea | LC08_L1TP_228008_20210618_20210628_02_T1 | ice_conc_svalbard_202106181500.nc | -1636 |
|    | East_Greenland_Sea | LC08_L1TP_233006_20210621_20210629_02_T1 | ice_conc_svalbard_202106211500.nc | 171   |
|    | East_Greenland_Sea | LC08_L1TP_007003_20210622_20210629_02_T1 | ice_conc_svalbard_202106221500.nc | 2696  |
|    | East_Greenland_Sea | LC08_L1TP_001005_20210628_20210707_02_T1 | ice_conc_svalbard_202106281500.nc | 520   |
|    | East_Greenland_Sea | LC08_L1TP_230007_20210702_20210708_02_T1 | ice_conc_svalbard_202107021500.nc | -915  |
|    | East_Greenland_Sea | LC08_L1TP_226002_20210706_20210713_02_T2 | ice_conc_svalbard_202107061500.nc | -2517 |
|    | East_Greenland_Sea | LC08_L1TP_001005_20210714_20210721_02_T1 | ice_conc_svalbard_202107141500.nc | 521   |
|    | East_Greenland_Sea | LC08_L1TP_002005_20210721_20210729_02_T1 | ice_conc_svalbard_202107211500.nc | 895   |
|    | East_Greenland_Sea | LC08_L1TP_229009_20210727_20210804_02_T1 | ice_conc_svalbard_202107271500.nc | -1231 |
|    | East_Greenland_Sea | LC08_L1TP_227012_20210729_20210804_02_T1 | ice_conc_svalbard_202107291500.nc | -1900 |
|    | East_Greenland_Sea | LC08_L1TP_006004_20210802_20210811_02_T1 | ice_conc_svalbard_202108021500.nc | 2361  |
|    | East_Greenland_Sea | LC08_L1TP_231008_20210810_20210819_02_T1 | ice_conc_svalbard_202108101500.nc | -507  |
|    | East_Greenland_Sea | LC08_L1TP_229007_20210812_20210819_02_T1 | ice_conc_svalbard_202108121500.nc | -1272 |
|    | East_Greenland_Sea | LC08_L1TP_232005_20210817_20210827_02_T1 | ice_conc_svalbard_202108171500.nc | -206  |
|    | East_Greenland_Sea | LC08_L1TP_233005_20210824_20210901_02_T1 | ice_conc_svalbard_202108241500.nc | 167   |
|    | East_Greenland_Sea | LC08_L1TP_005003_20210827_20210901_02_T2 | ice_conc_svalbard_202108271500.nc | 1974  |
|    | East_Greenland_Sea | LC08_L1TP_001004_20210831_20210909_02_T1 | ice_conc_svalbard_202108311500.nc | 516   |
|    | East_Greenland_Sea | LC08_L1TP_227010_20220411_20220419_02_T1 | ice_conc_svalbard_202204111500.nc | -1960 |
|    | East_Greenland_Sea | LC08_L1TP_001005_20220412_20220419_02_T1 | ice_conc_svalbard_202204121500.nc | 516   |
|    | East_Greenland_Sea | LC08_L1TP_233005_20220421_20220428_02_T1 | ice_conc_svalbard_202204211500.nc | 144   |
|    | East_Greenland_Sea | LC08_L1TP_229006_20220425_20220503_02_T2 | ice_conc_svalbard_202204251500.nc | -1317 |
|    | East_Greenland_Sea | LC08_L1TP_227010_20211001_20211013_02_T1 | ice_conc_svalbard_202110011500.nc | -1928 |
|    | East_Greenland_Sea | LC08_L1TP_232008_20220329_20220405_02_T1 | ice_conc_svalbard_202203291500.nc | -159  |
|    | East_Greenland_Sea | LC08_L1TP_007003_20220406_20220412_02_T1 | ice_conc_svalbard_202204061500.nc | 2690  |
|    | East_Greenland_Sea | LC08_L1TP_227007_20220427_20220503_02_T2 | ice_conc_svalbard_202204271500.nc | -2036 |
|    | East_Greenland_Sea | LC08_L1TP_001005_20220428_20220503_02_T1 | ice_conc_svalbard_202204281500.nc | 511   |
|    | East_Greenland_Sea | LC08_L1TP_230006_20220502_20220511_02_T1 | ice_conc_svalbard_202205021500.nc | -945  |
|    | East_Greenland_Sea | LC08_L1TP_226009_20220506_20220512_02_T1 | ice_conc_svalbard_202205061500.nc | -2353 |
|    | East_Greenland_Sea | LC08_L1TP_231006_20220509_20220518_02_T1 | ice_conc_svalbard_202205091500.nc | -569  |
|    | East_Greenland_Sea | LC08_L1TP_229008_20220511_20220519_02_T1 | ice_conc_svalbard_202205111500.nc | -1262 |
|    | East_Greenland_Sea | LC08_L1TP_232008_20220516_20220524_02_T1 | ice_conc_svalbard_202205161500.nc | -148  |
|    | East_Greenland_Sea | LC08_L1TP_230007_20220603_20220610_02_T1 | ice_conc_svalbard_202206031500.nc | -907  |
|    | East_Greenland_Sea | LC08_L1TP_226011_20220607_20220610_02_T1 | ice_conc_svalbard_202206071500.nc | -2292 |
|    | East_Greenland_Sea | LC08_L1TP_001005_20220701_20220707_02_T1 | ice_conc_svalbard_202207011500.nc | 541   |
|    | East_Greenland_Sea | LC08_L1TP_228001_20220707_20220721_02_T1 | ice_conc_svalbard_202207071500.nc | -1779 |
|    | East_Greenland_Sea | LC08_L1TP_231008_20220712_20220722_02_T1 | ice_conc_svalbard_202207121500.nc | -501  |
|    | East_Greenland_Sea | LC08_L1TP_225002_20220718_20220726_02_T1 | ice_conc_svalbard_202207181500.nc | -2867 |
|    | East_Greenland_Sea | LC08_L1TP_008003_20220803_20220817_02_T1 | ice_conc_svalbard_202208031500.nc | 3101  |
|    | East_Greenland_Sea | LC08_L1TP_009002_20220826_20220909_02_T1 | ice_conc_svalbard_202208261500.nc | 3454  |
|    | East_Greenland_Sea | LC08_L1TP_227009_20220902_20220910_02_T1 | ice_conc_svalbard_202209021500.nc | -1942 |
|    | East_Greenland_Sea | LC08_L1TP_232006_20220905_20220914_02_T1 | ice_conc_svalbard_202209051500.nc | -158  |
|    | Central_Arctic     | LC08_L1TP_225002_20210512_20210524_02_T1 | ice_conc_svalbard_202105121500.nc | -2909 |
|    | Central_Arctic     | LC08_L1TP_215245_20210607_20210615_02_T2 | ice_conc_svalbard_202106071500.nc | -790  |
|    | Central_Arctic     | LC08_L1TP_226002_20210706_20210713_02_T2 | ice_conc_svalbard_202107061500.nc | -2517 |
|    | Central_Arctic     | LC08_L1GT_216245_20220601_20220609_02_T2 | ice_conc_svalbard_202206011500.nc | -406  |
|    | Central_Arctic     | LC08_L1TP_228001_20220707_20220721_02_T1 | ice_conc_svalbard_202207071500.nc | -1779 |
|    | Central_Arctic     | LC08_L1TP_225002_20220718_20220726_02_T1 | ice_conc_svalbard_202207181500.nc | -2867 |
|    | Central_Arctic     | LC08_L1TP_209243_20220803_20220806_02_T1 | ice_conc_svalbard_202208031500.nc | -3023 |
|    | Kara_Sea           | LC08_L1GT_225238_20210629_20210708_02_T2 | ice_conc_svalbard_202106291500.nc | 2758  |
|    | Kara_Sea           | LC08_L1TP_209243_20220803_20220806_02_T1 | ice_conc_svalbard_202208031500.nc | -3023 |
| C4 | East_Greenland_Sea | LC08_L1TP_228010_20210330_20210409_02_T1 | ice_conc_svalbard_202103301500.nc | -1592 |
|    | East_Greenland_Sea | LC08_L1TP_003004_20210407_20210415_02_T1 | ice_conc_svalbard_202104071500.nc | 1229  |
|    | East_Greenland_Sea | LC08_L1TP_227012_20210408_20210416_02_T1 | ice_conc_svalbard_202104081500.nc | -1918 |
|    | East_Greenland_Sea | LC08_L1TP_001005_20210409_20210416_02_T1 | ice_conc_svalbard_202104091500.nc | 510   |
|    | East_Greenland_Sea | LC08_L1TP_229010_20210422_20210430_02_T1 | ice_conc_svalbard_202104221500.nc | -1230 |
|    | East_Greenland_Sea | LC08_L1TP_225011_20210426_20210501_02_T2 | ice_conc_svalbard_202104261500.nc | -2692 |
|    | East_Greenland_Sea | LC08_L1TP_232006_20210427_20210501_02_T1 | ice_conc_svalbard_202104271500.nc | -216  |

|                    |                                          |                                   |       |
|--------------------|------------------------------------------|-----------------------------------|-------|
| East_Greenland_Sea | LC08_L1TP_006003_20210428_20210507_02_T1 | ice_conc_svalbard_202104281500.nc | 2307  |
| East_Greenland_Sea | LC08_L1TP_001005_20210511_20210524_02_T1 | ice_conc_svalbard_202105111500.nc | 499   |
| East_Greenland_Sea | LC08_L1TP_008003_20210512_20210524_02_T1 | ice_conc_svalbard_202105121500.nc | 3048  |
| East_Greenland_Sea | LC08_L1TP_002005_20210518_20210528_02_T1 | ice_conc_svalbard_202105181500.nc | 874   |
| East_Greenland_Sea | LC08_L1TP_226010_20210519_20210528_02_T1 | ice_conc_svalbard_202105191500.nc | -2343 |
| East_Greenland_Sea | LC08_L1TP_001004_20210527_20210607_02_T1 | ice_conc_svalbard_202105271500.nc | 485   |
| East_Greenland_Sea | LC08_L1TP_231008_20210623_20210630_02_T1 | ice_conc_svalbard_202106231500.nc | -522  |
| East_Greenland_Sea | LC08_L1TP_231008_20210709_20210720_02_T1 | ice_conc_svalbard_202107091500.nc | -520  |
| East_Greenland_Sea | LC08_L1TP_002004_20210721_20210729_02_T1 | ice_conc_svalbard_202107211500.nc | 872   |
| East_Greenland_Sea | LC08_L1TP_229012_20210727_20210804_02_T1 | ice_conc_svalbard_202107271500.nc | -1159 |
| East_Greenland_Sea | LC08_L1TP_227011_20210729_20210804_02_T1 | ice_conc_svalbard_202107291500.nc | -1924 |
| East_Greenland_Sea | LC08_L1TP_001005_20210730_20210804_02_T1 | ice_conc_svalbard_202107301500.nc | 529   |
| East_Greenland_Sea | LC08_L1TP_005004_20210811_20210819_02_T1 | ice_conc_svalbard_202108111500.nc | 1994  |
| East_Greenland_Sea | LC08_L1TP_232008_20210817_20210827_02_T1 | ice_conc_svalbard_202108171500.nc | -134  |
| East_Greenland_Sea | LC08_L1TP_233006_20210824_20210901_02_T1 | ice_conc_svalbard_202108241500.nc | 190   |
| East_Greenland_Sea | LC08_L1TP_005004_20210827_20210901_02_T1 | ice_conc_svalbard_202108271500.nc | 1998  |
| East_Greenland_Sea | LC08_L1TP_232008_20210902_20210910_02_T1 | ice_conc_svalbard_202109021500.nc | -130  |
| East_Greenland_Sea | LC08_L1TP_006004_20210903_20210910_02_T1 | ice_conc_svalbard_202109031500.nc | 2371  |
| East_Greenland_Sea | LC08_L1TP_227012_20220411_20220419_02_T1 | ice_conc_svalbard_202204111500.nc | -1913 |
| East_Greenland_Sea | LC08_L1TP_229010_20220425_20220503_02_T1 | ice_conc_svalbard_202204251500.nc | -1221 |
| East_Greenland_Sea | LC08_L1TP_003004_20220426_20220503_02_T1 | ice_conc_svalbard_202204261500.nc | 1231  |
| East_Greenland_Sea | LC08_L1TP_225010_20220328_20220405_02_T2 | ice_conc_svalbard_202203281500.nc | -2706 |
| East_Greenland_Sea | LC08_L1TP_233006_20220405_20220412_02_T1 | ice_conc_svalbard_202204051500.nc | 166   |
| East_Greenland_Sea | LC08_L1TP_224011_20220406_20220412_02_T1 | ice_conc_svalbard_202204061500.nc | -3052 |
| East_Greenland_Sea | LC08_L1TP_008003_20220429_20220504_02_T1 | ice_conc_svalbard_202204291500.nc | 3060  |
| East_Greenland_Sea | LC08_L1TP_230009_20220502_20220511_02_T1 | ice_conc_svalbard_202205021500.nc | -873  |
| East_Greenland_Sea | LC08_L1TP_004004_20220503_20220511_02_T1 | ice_conc_svalbard_202205031500.nc | 1604  |
| East_Greenland_Sea | LC08_L1TP_002005_20220505_20220511_02_T1 | ice_conc_svalbard_202205051500.nc | 888   |
| East_Greenland_Sea | LC08_L1TP_226012_20220506_20220512_02_T1 | ice_conc_svalbard_202205061500.nc | -2282 |
| East_Greenland_Sea | LC08_L1TP_231008_20220509_20220518_02_T1 | ice_conc_svalbard_202205091500.nc | -521  |
| East_Greenland_Sea | LC08_L1TP_005004_20220510_20220518_02_T1 | ice_conc_svalbard_202205101500.nc | 1980  |
| East_Greenland_Sea | LC08_L1TP_229007_20220511_20220519_02_T1 | ice_conc_svalbard_202205111500.nc | -1286 |
| East_Greenland_Sea | LC08_L1TP_003004_20220512_20220519_02_T1 | ice_conc_svalbard_202205121500.nc | 1239  |
| East_Greenland_Sea | LC08_L1TP_228010_20220824_20220924_02_T1 | ice_conc_svalbard_202208241500.nc | -1547 |
| East_Greenland_Sea | LC08_L1TP_002005_20220825_20220924_02_T1 | ice_conc_svalbard_202208251500.nc | 929   |
| East_Greenland_Sea | LC08_L1TP_009003_20220826_20220909_02_T1 | ice_conc_svalbard_202208261500.nc | 3478  |
| East_Greenland_Sea | LC08_L1TP_227012_20220902_20220910_02_T1 | ice_conc_svalbard_202209021500.nc | -1871 |
| East_Greenland_Sea | LC08_L1TP_230008_20220923_20220929_02_T1 | ice_conc_svalbard_202209231500.nc | -846  |
| Central_Arctic     | LC08_L1TP_225001_20220718_20220726_02_T1 | ice_conc_svalbard_202207181500.nc | -2891 |

**Table S3: List of Landsat-8 scenes and ice charts used for evaluation. Time differences between the two data for each scene are also tabulated.**





|                                          |                                          |                                          |
|------------------------------------------|------------------------------------------|------------------------------------------|
| Barents Sea                              | C1                                       | C2                                       |
|                                          | LC08_L1TP_197001_20220425_20220503_02_T2 | LC08_L1TP_013242_20220518_20220525_02_T2 |
|                                          | LC08_L1TP_214002_20200731_20200908_02_T1 | LC08_L1TP_184015_20210222_20210303_02_T1 |
|                                          | LC08_L1GT_194002_20220420_20220427_02_T2 | LC08_L1TP_222001_20220424_20220503_02_T2 |
|                                          | LC08_L1GT_027238_20210602_20210608_02_T2 | LC08_L1TP_177006_20220328_20220405_02_T2 |
|                                          | LC08_L1TP_172010_20210322_20210401_02_T1 | LC08_L1GT_204246_20220426_20220503_02_T2 |
|                                          | LC08_L1TP_180008_20220605_20220610_02_T1 | LC08_L1TP_171012_20210315_20210328_02_T1 |
|                                          | LC08_L1TP_186013_20210409_20210416_02_T1 | LC08_L1TP_210002_20210503_20210508_02_T2 |
|                                          | LC08_L1TP_179006_20210915_20210924_02_T1 | LC08_L1TP_203245_20210502_20210508_02_T1 |
|                                          | LC08_L1TP_008242_20220718_20220725_02_T1 | LC08_L1TP_176011_20210318_20210328_02_T1 |
|                                          | LC08_L1TP_169012_20220304_20220314_02_T1 | LC08_L1TP_169011_20210317_20210328_02_T2 |
|                                          | C3                                       | C4                                       |
|                                          | LC08_L1TP_183014_20220712_20220722_02_T1 | LC08_L1TP_184012_20200526_20200820_02_T1 |
|                                          | LC08_L1TP_177013_20220531_20220609_02_T1 | LC08_L1TP_185015_20200330_20200822_02_T1 |
|                                          | LC08_L1TP_023239_20210606_20210615_02_T1 | LC08_L1TP_186014_20200321_20200822_02_T1 |
|                                          | LC08_L1TP_205002_20200817_20200920_02_T2 | LC08_L1TP_176011_20200721_20200911_02_T1 |
|                                          | LC08_L1TP_023240_20200619_20200824_02_T1 | LC08_L1TP_178008_20220607_20220610_02_T1 |
|                                          | LC08_L1TP_169012_20210925_20211001_02_T1 | LC08_L1TP_185014_20210605_20210614_02_T1 |
|                                          | LC08_L1TP_172012_20210626_20210707_02_T1 | LC08_L1TP_184015_20211004_20211013_02_T1 |
|                                          | LC08_L1TP_174011_20220408_20220412_02_T1 | LC08_L1TP_184012_20220703_20220708_02_T1 |
| LC08_L1TP_208003_20200619_20200823_02_T1 | LC08_L1TP_174011_20200723_20200911_02_T1 |                                          |
| LC08_L1TP_026240_20220529_20220603_02_T2 | LC08_L1TP_178014_20200719_20200911_02_T1 |                                          |
| Beaufort Sea                             | C1                                       | C2                                       |
|                                          | LC08_L1TP_060010_20210625_20210707_02_T1 | LC08_L1TP_071011_20210403_20210409_02_T1 |
|                                          | LC08_L1GT_065010_20220717_20220725_02_T2 | LC08_L1TP_059011_20210330_20210409_02_T1 |
|                                          | LC08_L1TP_063006_20210326_20210402_02_T1 | LC08_L1TP_065006_20220327_20220405_02_T2 |
|                                          | LC08_L1GT_071008_20220524_20220602_02_T2 | LC08_L1TP_071010_20210403_20210409_02_T2 |
|                                          | LC08_L1TP_072010_20200610_20200823_02_T1 | LC08_L1TP_078010_20220322_20220330_02_T2 |
|                                          | LC08_L1TP_071010_20220406_20220412_02_T2 | LC08_L1TP_075010_20200311_20200822_02_T2 |
|                                          | LC08_L1TP_061011_20220416_20220420_02_T1 | LC08_L1TP_065006_20210409_20210416_02_T2 |
|                                          | LC08_L1TP_059009_20210415_20210424_02_T1 | LC08_L1TP_079010_20210411_20210416_02_T2 |
|                                          | LC08_L1TP_061008_20220721_20220801_02_T1 | LC08_L1TP_077010_20210328_20210402_02_T1 |
|                                          | LC08_L1TP_072011_20210410_20210416_02_T1 | LC08_L1TP_075011_20210314_20210328_02_T1 |
|                                          | C3                                       | C4                                       |
|                                          | LC08_L1TP_080010_20200704_20200913_02_T1 | LC08_L1TP_060010_20220324_20220330_02_T1 |
|                                          | LC08_L1GT_073006_20220506_20220512_02_T2 | LC08_L1TP_065012_20220327_20220405_02_T1 |
|                                          | LC08_L1TP_063011_20210513_20210524_02_T2 | LC08_L1TP_073011_20200430_20200820_02_T1 |
|                                          | LC08_L1TP_079010_20200510_20200820_02_T1 | LC08_L1GT_071010_20220422_20220428_02_T2 |
|                                          | LC08_L1TP_063011_20210614_20210622_02_T1 | LC08_L1GT_072010_20220312_20220321_02_T2 |
|                                          | LC08_L1TP_064006_20220507_20220512_02_T2 | LC08_L1TP_063011_20200611_20200824_02_T1 |
|                                          | LC08_L1TP_070011_20220330_20220406_02_T1 | LC08_L1TP_079010_20210326_20210402_02_T1 |
|                                          | LC08_L1TP_064011_20210418_20210424_02_T1 | LC08_L1TP_075011_20210720_20210729_02_T1 |

|            |                                                                                                                                                                                                                                                                                                                                                                                                                                                      |                                                                                                                                                                                                                                                                                                                                                                                                                                                      |  |
|------------|------------------------------------------------------------------------------------------------------------------------------------------------------------------------------------------------------------------------------------------------------------------------------------------------------------------------------------------------------------------------------------------------------------------------------------------------------|------------------------------------------------------------------------------------------------------------------------------------------------------------------------------------------------------------------------------------------------------------------------------------------------------------------------------------------------------------------------------------------------------------------------------------------------------|--|
|            | LC08_L1TP_061011_20200731_20200908_02_T1<br>LC08_L1TP_065006_20210425_20210501_02_T2                                                                                                                                                                                                                                                                                                                                                                 | LC08_L1TP_072011_20210715_20210721_02_T1<br>LC08_L1TP_062008_20220423_20220428_02_T2                                                                                                                                                                                                                                                                                                                                                                 |  |
| Bering Sea | C1                                                                                                                                                                                                                                                                                                                                                                                                                                                   | C2                                                                                                                                                                                                                                                                                                                                                                                                                                                   |  |
|            | LC08_L1TP_090014_20200304_20200822_02_T2<br>LC08_L1GT_090015_20200405_20200822_02_T2<br>LC08_L1TP_080015_20221014_20221021_02_T1<br>LC08_L1TP_084014_20200310_20200822_02_T1<br>LC08_L1TP_095021_20200627_20200823_02_T1<br>LC08_L1TP_094017_20210319_20210328_02_T1<br>LC08_L1TP_079016_20200408_20200822_02_T1<br>LC08_L1TP_073020_20200210_20200823_02_T1<br>LC08_L1TP_084016_20210225_20210304_02_T2<br>LC08_L1TP_077023_20220126_20220204_02_T1 | LC08_L1TP_090015_20210408_20210416_02_T2<br>LC08_L1TP_082016_20200225_20200822_02_T2<br>LC08_L1TP_086013_20210311_20210317_02_T2<br>LC08_L1GT_082017_20200225_20200822_02_T2<br>LC08_L1TP_082014_20200328_20200822_02_T1<br>LC08_L1TP_086013_20210327_20210402_02_T2<br>LC08_L1TP_087014_20210318_20210328_02_T2<br>LC08_L1TP_079018_20210310_20210317_02_T2<br>LC08_L1TP_082015_20200328_20200822_02_T2<br>LC08_L1TP_075018_20200224_20200822_02_T2 |  |
|            | C3                                                                                                                                                                                                                                                                                                                                                                                                                                                   | C4                                                                                                                                                                                                                                                                                                                                                                                                                                                   |  |
|            | LC08_L1TP_096018_20220524_20220602_02_T1<br>LC08_L1TP_089016_20200617_20200823_02_T1<br>LC08_L1TP_079014_20220430_20220504_02_T1<br>LC08_L1TP_090015_20200608_20200824_02_T1<br>LC08_L1TP_098021_20220826_20220924_02_T1<br>LC08_L1TP_083024_20211203_20211209_02_T1<br>LC08_L1TP_086013_20220602_20220610_02_T1<br>LC08_L1TP_099019_20200928_20201006_02_T1<br>LC08_L1TP_073019_20210924_20210930_02_T1<br>LC08_L1TP_078017_20200519_20200820_02_T1 | LC08_L1TP_099019_20200304_20200822_02_T1<br>LC08_L1TP_092013_20220425_20220503_02_T1<br>LC08_L1TP_082016_20220419_20220427_02_T1<br>LC08_L1TP_090014_20210526_20210607_02_T1<br>LC08_L1TP_098020_20210417_20210424_02_T1<br>LC08_L1TP_096017_20200228_20200822_02_T1<br>LC08_L1TP_096017_20211028_20211104_02_T1<br>LC08_L1TP_092015_20210711_20210720_02_T1<br>LC08_L1TP_095018_20220601_20220609_02_T1<br>LC08_L1TP_078016_20210420_20210430_02_T1 |  |
|            | C1                                                                                                                                                                                                                                                                                                                                                                                                                                                   | C2                                                                                                                                                                                                                                                                                                                                                                                                                                                   |  |
|            | LC08_L1TP_046013_20200417_20200822_02_T2<br>LC08_L1TP_106240_20220615_20220627_02_T1<br>LC08_L1TP_061001_20210515_20210525_02_T1<br>LC08_L1TP_060247_20210422_20210430_02_T1<br>LC08_L1TP_060004_20210508_20210518_02_T1<br>LC08_L1TP_062001_20220525_20220602_02_T1<br>LC08_L1TP_053009_20210320_20210401_02_T2<br>LC08_L1TP_033009_20200321_20200822_02_T1<br>LC08_L1TP_056011_20210410_20210416_02_T1<br>LC08_L1TP_106238_20200609_20200824_02_T1 | LC08_L1TP_036010_20210329_20210409_02_T2<br>LC08_L1TP_055247_20220422_20220428_02_T1<br>LC08_L1TP_050008_20210331_20210409_02_T2<br>LC08_L1TP_049007_20220327_20220405_02_T2<br>LC08_L1TP_032012_20210317_20210328_02_T1<br>LC08_L1TP_059009_20210330_20210409_02_T2<br>LC08_L1TP_052011_20210329_20210409_02_T1<br>LC08_L1TP_061006_20200325_20200822_02_T1<br>LC08_L1TP_049006_20220327_20220405_02_T2<br>LC08_L1TP_041009_20220420_20220428_02_T2 |  |
|            | C3                                                                                                                                                                                                                                                                                                                                                                                                                                                   | C4                                                                                                                                                                                                                                                                                                                                                                                                                                                   |  |
|            | LC08_L1TP_037009_20220408_20220412_02_T1<br>LC08_L1TP_043011_20210922_20210930_02_T1<br>LC08_L1TP_062001_20220626_20220706_02_T1<br>LC08_L1TP_041011_20200313_20200822_02_T2<br>LC08_L1TP_060007_20210828_20210901_02_T1<br>LC08_L1TP_041012_20220420_20220428_02_T2                                                                                                                                                                                 | LC08_L1TP_065006_20210425_20210501_02_T2<br>LC08_L1TP_057006_20210503_20210508_02_T1<br>LC08_L1TP_080243_20220726_20220802_02_T1<br>LC08_L1TP_059004_20210618_20210628_02_T1<br>LC08_L1TP_047013_20220329_20220406_02_T1<br>LC08_L1TP_058247_20210424_20210501_02_T1                                                                                                                                                                                 |  |
|            | Canadian Archipelago                                                                                                                                                                                                                                                                                                                                                                                                                                 |                                                                                                                                                                                                                                                                                                                                                                                                                                                      |  |

|                |                                                                                                                                                                                                                                                                                                                                                                                                                                                      |                                                                                                                                                                                                                                                                                                                                                                                                                                                      |  |
|----------------|------------------------------------------------------------------------------------------------------------------------------------------------------------------------------------------------------------------------------------------------------------------------------------------------------------------------------------------------------------------------------------------------------------------------------------------------------|------------------------------------------------------------------------------------------------------------------------------------------------------------------------------------------------------------------------------------------------------------------------------------------------------------------------------------------------------------------------------------------------------------------------------------------------------|--|
|                | LC08_L1TP_042012_20210611_20210622_02_T1<br>LC08_L1TP_039012_20210708_20210713_02_T1<br>LC08_L1TP_060004_20200809_20200917_02_T1<br>LC08_L1TP_047011_20210630_20210708_02_T1                                                                                                                                                                                                                                                                         | LC08_L1TP_035008_20200725_20200908_02_T1<br>LC08_L1TP_060001_20220511_20220519_02_T1<br>LC08_L1TP_055002_20200502_20200820_02_T1<br>LC08_L1TP_055010_20220711_20220722_02_T1                                                                                                                                                                                                                                                                         |  |
| Central Arctic | C1                                                                                                                                                                                                                                                                                                                                                                                                                                                   | C2                                                                                                                                                                                                                                                                                                                                                                                                                                                   |  |
|                | LC08_L1TP_085243_20220714_20220722_02_T1<br>LC08_L1TP_056248_20220413_20220420_02_T1<br>LC08_L1TP_060004_20200419_20200822_02_T1<br>LC08_L1TP_039244_20220524_20220602_02_T1<br>LC08_L1TP_022245_20210514_20210525_02_T1<br>LC08_L1TP_227001_20200726_20200908_02_T1<br>LC08_L1TP_198242_20200512_20200820_02_T1<br>LC08_L1TP_042245_20220427_20220503_02_T1<br>LC08_L1TP_219002_20210822_20210827_02_T1<br>LC08_L1TP_074245_20220614_20220627_02_T1 | LC08_L1TP_023244_20210505_20210517_02_T2<br>LC08_L1TP_065003_20220412_20220419_02_T2<br>LC08_L1TP_065005_20220327_20220405_02_T1<br>LC08_L1TP_065005_20210409_20210416_02_T2<br>LC08_L1TP_062005_20220407_20220412_02_T1<br>LC08_L1TP_064006_20220421_20220428_02_T2<br>LC08_L1GT_192246_20200502_20210106_02_T2<br>LC08_L1TP_124006_20210407_20210415_02_T1<br>LC08_L1TP_065002_20220412_20220419_02_T2<br>LC08_L1TP_029247_20220416_20220420_02_T1 |  |
|                | C3                                                                                                                                                                                                                                                                                                                                                                                                                                                   | C4                                                                                                                                                                                                                                                                                                                                                                                                                                                   |  |
|                | LC08_L1TP_031244_20220617_20220629_02_T1<br>LC08_L1TP_006247_20220821_20220923_02_T1<br>LC08_L1TP_063006_20220617_20220629_02_T1<br>LC08_L1TP_052245_20210617_20210628_02_T1<br>LC08_L1TP_012248_20220714_20220725_02_T1<br>LC08_L1TP_063004_20200627_20200823_02_T1<br>LC08_L1TP_015247_20210513_20210524_02_T1<br>LC08_L1TP_032245_20220523_20220602_02_T1<br>LC08_L1TP_217002_20210808_20210819_02_T1<br>LC08_L1TP_066001_20220825_20220924_02_T1 | LC08_L1TP_030245_20210623_20210630_02_T1<br>LC08_L1TP_048248_20200415_20200822_02_T1<br>LC08_L1TP_035247_20220512_20220519_02_T1<br>LC08_L1GT_073005_20220506_20220512_02_T2<br>LC08_L1TP_033244_20220530_20220609_02_T1<br>LC08_L1TP_049246_20210527_20210607_02_T1<br>LC08_L1GT_182247_20220721_20220726_02_T2<br>LC08_L1TP_074244_20220801_20220805_02_T1<br>LC08_L1TP_013247_20200629_20200823_02_T1<br>LC08_L1TP_059004_20210415_20210424_02_T1 |  |
|                | C1                                                                                                                                                                                                                                                                                                                                                                                                                                                   | C2                                                                                                                                                                                                                                                                                                                                                                                                                                                   |  |
|                | LC08_L1TP_087013_20210318_20210328_02_T2<br>LC08_L1TP_079013_20220703_20220707_02_T1<br>LC08_L1TP_091012_20200412_20200822_02_T2<br>LC08_L1TP_081011_20200508_20200820_02_T2<br>LC08_L1GT_092010_20220409_20220419_02_T2<br>LC08_L1TP_086014_20200409_20200822_02_T1<br>LC08_L1TP_090013_20220801_20220805_02_T1<br>LC08_L1TP_090012_20220326_20220330_02_T2<br>LC08_L1TP_094011_20200417_20200825_02_T2<br>LC08_L1TP_080011_20210317_20210328_02_T1 | LC08_L1TP_082013_20200328_20200822_02_T1<br>LC08_L1TP_095011_20210310_20210317_02_T2<br>LC08_L1TP_086014_20210327_20210402_02_T1<br>LC08_L1TP_091012_20220402_20220412_02_T1<br>LC08_L1TP_084013_20220401_20220411_02_T2<br>LC08_L1TP_086013_20210327_20210402_02_T2<br>LC08_L1TP_079014_20200408_20200822_02_T1<br>LC08_L1TP_086013_20210311_20210317_02_T2<br>LC08_L1TP_091012_20200327_20200822_02_T2<br>LC08_L1TP_095010_20210310_20210317_02_T2 |  |
|                | C3                                                                                                                                                                                                                                                                                                                                                                                                                                                   | C4                                                                                                                                                                                                                                                                                                                                                                                                                                                   |  |
|                | LC08_L1TP_083010_20200709_20210330_02_T1<br>LC08_L1TP_079014_20200814_20200920_02_T1<br>LC08_L1TP_084013_20200614_20200823_02_T1<br>LC08_L1TP_082013_20200515_20200820_02_T1                                                                                                                                                                                                                                                                         | LC08_L1TP_083014_20200607_20200824_02_T1<br>LC08_L1TP_080014_20200330_20200822_02_T1<br>LC08_L1TP_080011_20220320_20220329_02_T2<br>LC08_L1TP_079013_20220313_20220322_02_T1                                                                                                                                                                                                                                                                         |  |
|                | Chukchi Sea                                                                                                                                                                                                                                                                                                                                                                                                                                          |                                                                                                                                                                                                                                                                                                                                                                                                                                                      |  |

|                       |                                                                                                                                                                                                                                                                                                                                                                                                                                                      |                                                                                                                                                                                                                                                                                                                                                                                                                                                      |                                                                                                                                                                                                                                                                                                                                                                                                                                                      |
|-----------------------|------------------------------------------------------------------------------------------------------------------------------------------------------------------------------------------------------------------------------------------------------------------------------------------------------------------------------------------------------------------------------------------------------------------------------------------------------|------------------------------------------------------------------------------------------------------------------------------------------------------------------------------------------------------------------------------------------------------------------------------------------------------------------------------------------------------------------------------------------------------------------------------------------------------|------------------------------------------------------------------------------------------------------------------------------------------------------------------------------------------------------------------------------------------------------------------------------------------------------------------------------------------------------------------------------------------------------------------------------------------------------|
|                       | LC08_L1TP_096010_20220523_20220602_02_T1<br>LC08_L1TP_092012_20210422_20210430_02_T2<br>LC08_L1TP_088013_20220803_20220818_02_T1<br>LC08_L1TP_086014_20220602_20220610_02_T1<br>LC08_L1TP_083012_20210525_20210529_02_T1<br>LC08_L1TP_081013_20200711_20200912_02_T1                                                                                                                                                                                 | LC08_L1TP_081012_20220311_20220321_02_T1<br>LC08_L1TP_088013_20220312_20220321_02_T2<br>LC08_L1TP_092011_20220425_20220503_02_T2<br>LC08_L1TP_087013_20220422_20220428_02_T2<br>LC08_L1TP_081011_20210425_20210501_02_T1<br>LC08_L1TP_079010_20220414_20220420_02_T2                                                                                                                                                                                 |                                                                                                                                                                                                                                                                                                                                                                                                                                                      |
| East Greenland<br>Sea | C1                                                                                                                                                                                                                                                                                                                                                                                                                                                   | C2                                                                                                                                                                                                                                                                                                                                                                                                                                                   |                                                                                                                                                                                                                                                                                                                                                                                                                                                      |
|                       | LC08_L1TP_227011_20210915_20210925_02_T1<br>LC08_L1TP_232016_20200323_20200822_02_T1<br>LC08_L1TP_052240_20210601_20210608_02_T1<br>LC08_L1TP_019245_20200725_20200908_02_T1<br>LC08_L1TP_229013_20220730_20220806_02_T1<br>LC08_L1TP_026244_20210627_20210707_02_T1<br>LC08_L1TP_233006_20210418_20210424_02_T1<br>LC08_L1TP_216003_20200424_20200822_02_T1<br>LC08_L1TP_229010_20210508_20210518_02_T1<br>LC08_L1TP_230006_20200528_20200820_02_T1 | LC08_L1TP_229009_20220324_20220330_02_T1<br>LC08_L1TP_230008_20200325_20200822_02_T1<br>LC08_L1TP_009003_20220404_20220412_02_T1<br>LC08_L1TP_228008_20220317_20220322_02_T1<br>LC08_L1TP_228008_20200412_20200822_02_T1<br>LC08_L1TP_010003_20210408_20210416_02_T1<br>LC08_L1TP_024245_20220429_20220504_02_T1<br>LC08_L1TP_228012_20210330_20210409_02_T1<br>LC08_L1TP_230006_20220331_20220406_02_T2<br>LC08_L1TP_231007_20200401_20200822_02_T1 |                                                                                                                                                                                                                                                                                                                                                                                                                                                      |
|                       | C3                                                                                                                                                                                                                                                                                                                                                                                                                                                   | C4                                                                                                                                                                                                                                                                                                                                                                                                                                                   |                                                                                                                                                                                                                                                                                                                                                                                                                                                      |
|                       | LC08_L1TP_227008_20200827_20200906_02_T1<br>LC08_L1TP_001005_20210527_20210607_02_T1<br>LC08_L1TP_228001_20220707_20220721_02_T1<br>LC08_L1GT_229001_20210711_20210720_02_T2<br>LC08_L1TP_001004_20210831_20210909_02_T1<br>LC08_L1TP_035243_20220512_20220519_02_T1<br>LC08_L1TP_228007_20200428_20200820_02_T1<br>LC08_L1TP_218013_20210527_20210607_02_T1<br>LC08_L1TP_045241_20210616_20210622_02_T1<br>LC08_L1TP_024244_20210512_20210524_02_T1 | LC08_L1TP_220014_20220528_20220603_02_T1<br>LC08_L1TP_002005_20220505_20220511_02_T1<br>LC08_L1TP_012002_20210406_20210415_02_T1<br>LC08_L1TP_006003_20220501_20220511_02_T1<br>LC08_L1TP_037242_20200621_20200823_02_T1<br>LC08_L1TP_229008_20210422_20210430_02_T1<br>LC08_L1TP_231006_20220423_20220428_02_T1<br>LC08_L1TP_037243_20210523_20210529_02_T1<br>LC08_L1TP_233017_20200922_20210005_02_T1<br>LC08_L1TP_045241_20200629_20200824_02_T1 |                                                                                                                                                                                                                                                                                                                                                                                                                                                      |
|                       | East Siberian Sea                                                                                                                                                                                                                                                                                                                                                                                                                                    | C1                                                                                                                                                                                                                                                                                                                                                                                                                                                   | C2                                                                                                                                                                                                                                                                                                                                                                                                                                                   |
|                       |                                                                                                                                                                                                                                                                                                                                                                                                                                                      | LC08_L1TP_121009_20210317_20210328_02_T2<br>LC08_L1TP_108010_20200319_20200822_02_T2<br>LC08_L1TP_121009_20200330_20200822_02_T1<br>LC08_L1TP_099012_20220310_20220315_02_T2<br>LC08_L1TP_122007_20220412_20220419_02_T1<br>LC08_L1TP_100012_20210501_20210508_02_T1<br>LC08_L1TP_100011_20200311_20200822_02_T2<br>LC08_L1TP_178238_20210620_20210629_02_T1<br>LC08_L1TP_094011_20210319_20210328_02_T2<br>LC08_L1TP_100011_20210330_20210409_02_T2 | LC08_L1TP_108011_20210322_20210401_02_T1<br>LC08_L1TP_099012_20220411_20220419_02_T1<br>LC08_L1TP_095011_20210326_20210402_02_T2<br>LC08_L1TP_125006_20210414_20210423_02_T2<br>LC08_L1TP_099011_20210323_20210402_02_T1<br>LC08_L1TP_125007_20200326_20200822_02_T1<br>LC08_L1TP_128006_20210403_20210409_02_T2<br>LC08_L1TP_113010_20200322_20200822_02_T2<br>LC08_L1TP_099012_20210307_20210317_02_T2<br>LC08_L1TP_099011_20210408_20210416_02_T2 |
|                       |                                                                                                                                                                                                                                                                                                                                                                                                                                                      | C3                                                                                                                                                                                                                                                                                                                                                                                                                                                   | C4                                                                                                                                                                                                                                                                                                                                                                                                                                                   |
|                       |                                                                                                                                                                                                                                                                                                                                                                                                                                                      | LC08_L1TP_103011_20220407_20220412_02_T1<br>LC08_L1TP_108010_20210626_20210707_02_T1                                                                                                                                                                                                                                                                                                                                                                 | LC08_L1TP_111010_20220330_20220406_02_T1<br>LC08_L1TP_106011_20210527_20210607_02_T1                                                                                                                                                                                                                                                                                                                                                                 |

|            |                                                                                                                                                                                                                                                                                                                                                                                                                                                      |                                                                                                                                                                                                                                                                                                                                                                                                                                                      |
|------------|------------------------------------------------------------------------------------------------------------------------------------------------------------------------------------------------------------------------------------------------------------------------------------------------------------------------------------------------------------------------------------------------------------------------------------------------------|------------------------------------------------------------------------------------------------------------------------------------------------------------------------------------------------------------------------------------------------------------------------------------------------------------------------------------------------------------------------------------------------------------------------------------------------------|
|            | LC08_L1GT_176239_20220609_20220616_02_T2<br>LC08_L1TP_115010_20200405_20200822_02_T2<br>LC08_L1TP_102011_20220502_20220511_02_T2<br>LC08_L1TP_099011_20220817_20220824_02_T1<br>LC08_L1TP_096010_20220608_20220616_02_T1<br>LC08_L1GT_121008_20200517_20200820_02_T2<br>LC08_L1TP_119008_20220407_20220412_02_T2<br>LC08_L1TP_105011_20210707_20210713_02_T1                                                                                         | LC08_L1TP_093011_20220315_20220322_02_T2<br>LC08_L1GT_170239_20200711_20200912_02_T2<br>LC08_L1TP_119009_20200620_20200823_02_T1<br>LC08_L1TP_096011_20220320_20220329_02_T1<br>LC08_L1TP_109010_20210516_20210525_02_T1<br>LC08_L1TP_097011_20200509_20200820_02_T2<br>LC08_L1TP_098011_20220404_20220412_02_T1<br>LC08_L1TP_108010_20210525_20210529_02_T1                                                                                         |
| Hudson Bay | C1                                                                                                                                                                                                                                                                                                                                                                                                                                                   | C2                                                                                                                                                                                                                                                                                                                                                                                                                                                   |
|            | LC08_L1TP_025017_20210417_20210424_02_T2<br>LC08_L1TP_030010_20200417_20200822_02_T1<br>LC08_L1TP_028010_20220511_20220519_02_T1<br>LC08_L1TP_028011_20210929_20211012_02_T1<br>LC08_L1TP_028010_20200505_20200820_02_T1<br>LC08_L1TP_021020_20220627_20220706_02_T1<br>LC08_L1TP_029020_20210328_20210402_02_T1<br>LC08_L1TP_017017_20210324_20210402_02_T2<br>LC08_L1TP_024012_20200423_20200822_02_T1<br>LC08_L1TP_032016_20220320_20220329_02_T1 | LC08_L1TP_023018_20210318_20210328_02_T2<br>LC08_L1TP_020021_20220316_20220322_02_T1<br>LC08_L1TP_019016_20200404_20200822_02_T1<br>LC08_L1TP_027014_20210330_20210409_02_T1<br>LC08_L1TP_022021_20200308_20200822_02_T1<br>LC08_L1TP_032018_20200314_20200822_02_T2<br>LC08_L1TP_015018_20210326_20210402_02_T2<br>LC08_L1TP_029015_20200309_20200822_02_T2<br>LC08_L1TP_023012_20200331_20200822_02_T2<br>LC08_L1TP_026011_20200421_20200822_02_T1 |
|            | C3                                                                                                                                                                                                                                                                                                                                                                                                                                                   | C4                                                                                                                                                                                                                                                                                                                                                                                                                                                   |
|            | LC08_L1TP_021023_20220713_20220722_02_T1<br>LC08_L1TP_033019_20220818_20220823_02_T1<br>LC08_L1TP_028011_20210406_20210415_02_T2<br>LC08_L1TP_024014_20210715_20210721_02_T1<br>LC08_L1TP_023016_20210318_20210328_02_T1<br>LC08_L1TP_024016_20210901_20210909_02_T1<br>LC08_L1TP_025012_20210924_20210930_02_T1<br>LC08_L1TP_019020_20220426_20220503_02_T2<br>LC08_L1TP_022021_20220906_20220914_02_T1<br>LC08_L1GT_026014_20220513_20220519_02_T2 | LC08_L1TP_030016_20220407_20220412_02_T2<br>LC08_L1TP_020023_20220924_20221004_02_T1<br>LC08_L1TP_032018_20210317_20210328_02_T1<br>LC08_L1TP_026016_20200405_20200822_02_T2<br>LC08_L1TP_027016_20200701_20200913_02_T1<br>LC08_L1TP_019024_20210712_20210720_02_T1<br>LC08_L1TP_029013_20220619_20220630_02_T1<br>LC08_L1TP_019020_20220325_20220330_02_T1<br>LC08_L1TP_019016_20220715_20220725_02_T1<br>LC08_L1TP_026021_20221004_20221012_02_T1 |
| Kara Sea   | C1                                                                                                                                                                                                                                                                                                                                                                                                                                                   | C2                                                                                                                                                                                                                                                                                                                                                                                                                                                   |
|            | LC08_L1TP_160010_20220422_20220428_02_T2<br>LC08_L1TP_177006_20220328_20220405_02_T2<br>LC08_L1TP_205245_20210430_20210508_02_T1<br>LC08_L1TP_165012_20200403_20200822_02_T1<br>LC08_L1TP_163008_20210323_20210402_02_T2<br>LC08_L1TP_162003_20200414_20200822_02_T2<br>LC08_L1TP_168008_20200408_20200822_02_T1<br>LC08_L1TP_160009_20220406_20220412_02_T2<br>LC08_L1GT_210241_20200703_20200913_02_T2<br>LC08_L1TP_164009_20220402_20220411_02_T1 | LC08_L1TP_160008_20210403_20210409_02_T2<br>LC08_L1TP_161013_20200306_20200822_02_T2<br>LC08_L1GT_160003_20210403_20210409_02_T2<br>LC08_L1TP_164008_20210330_20210409_02_T2<br>LC08_L1GT_158003_20220510_20220518_02_T2<br>LC08_L1TP_169011_20210317_20210328_02_T2<br>LC08_L1TP_167003_20210404_20210409_02_T2<br>LC08_L1GT_192246_20200502_20201016_02_T2<br>LC08_L1TP_165007_20210321_20210401_02_T2<br>LC08_L1TP_160009_20200416_20200822_02_T2 |
|            | C3                                                                                                                                                                                                                                                                                                                                                                                                                                                   | C4                                                                                                                                                                                                                                                                                                                                                                                                                                                   |
|            |                                                                                                                                                                                                                                                                                                                                                                                                                                                      |                                                                                                                                                                                                                                                                                                                                                                                                                                                      |

|            |                                                                                                                                                                                                                                                                                                                                                                                                                                                      |                                                                                                                                                                                                                                                                                                                                                                                                                                                      |
|------------|------------------------------------------------------------------------------------------------------------------------------------------------------------------------------------------------------------------------------------------------------------------------------------------------------------------------------------------------------------------------------------------------------------------------------------------------------|------------------------------------------------------------------------------------------------------------------------------------------------------------------------------------------------------------------------------------------------------------------------------------------------------------------------------------------------------------------------------------------------------------------------------------------------------|
|            | LC08_L1TP_167010_20210810_20210819_02_T1<br>LC08_L1TP_151005_20220509_20220518_02_T1<br>LC08_L1TP_166009_20210328_20210402_02_T1<br>LC08_L1TP_158008_20220627_20220706_02_T1<br>LC08_L1TP_201242_20200704_20200913_02_T1<br>LC08_L1TP_172010_20210712_20210720_02_T1<br>LC08_L1TP_161008_20210629_20210708_02_T1<br>LC08_L1TP_175010_20220602_20220609_02_T1<br>LC08_L1TP_160005_20200705_20200913_02_T1<br>LC08_L1TP_179006_20220716_20220726_02_T1 | LC08_L1TP_172011_20220613_20220617_02_T1<br>LC08_L1TP_164002_20200412_20200822_02_T2<br>LC08_L1TP_164007_20210330_20210409_02_T1<br>LC08_L1TP_185248_20220421_20220428_02_T1<br>LC08_L1TP_182246_20220721_20220726_02_T1<br>LC08_L1TP_164010_20200514_20200820_02_T1<br>LC08_L1TP_158007_20220611_20220617_02_T1<br>LC08_L1TP_168010_20210614_20210622_02_T1<br>LC08_L1TP_172011_20220731_20220806_02_T1<br>LC08_L1TP_158009_20200504_20200820_02_T2 |
|            | C1                                                                                                                                                                                                                                                                                                                                                                                                                                                   | C2                                                                                                                                                                                                                                                                                                                                                                                                                                                   |
| Laptev Sea | LC08_L1TP_155005_20220419_20220427_02_T1<br>LC08_L1TP_147006_20210323_20210402_02_T1<br>LC08_L1TP_144006_20200416_20200822_02_T1<br>LC08_L1TP_125010_20200310_20200822_02_T2<br>LC08_L1TP_132009_20220317_20220322_02_T1<br>LC08_L1GT_149005_20210406_20210415_02_T2<br>LC08_L1TP_139008_20220318_20220322_02_T2<br>LC08_L1TP_144007_20220321_20220329_02_T1<br>LC08_L1TP_127006_20210428_20210507_02_T2<br>LC08_L1TP_150006_20220416_20220420_02_T1 | LC08_L1TP_121008_20220320_20220329_02_T1<br>LC08_L1TP_124007_20200404_20200822_02_T1<br>LC08_L1TP_128006_20210403_20210409_02_T2<br>LC08_L1TP_130008_20210401_20210409_02_T2<br>LC08_L1TP_150005_20220416_20220420_02_T1<br>LC08_L1TP_129006_20210325_20210402_02_T2<br>LC08_L1TP_174001_20220424_20220428_02_T2<br>LC08_L1TP_151005_20200417_20200822_02_T2<br>LC08_L1TP_129010_20210410_20210416_02_T1<br>LC08_L1TP_155004_20210331_20210409_02_T2 |
|            | C3                                                                                                                                                                                                                                                                                                                                                                                                                                                   | C4                                                                                                                                                                                                                                                                                                                                                                                                                                                   |
|            | LC08_L1TP_133009_20220425_20220503_02_T1<br>LC08_L1TP_131008_20210713_20210721_02_T1<br>LC08_L1TP_126010_20200621_20200823_02_T1<br>LC08_L1TP_150006_20200731_20200908_02_T1<br>LC08_L1TP_166002_20220502_20220511_02_T2<br>LC08_L1GT_158003_20220510_20220518_02_T2<br>LC08_L1TP_121010_20220405_20220412_02_T2<br>LC08_L1TP_130009_20210417_20210424_02_T2<br>LC08_L1TP_124009_20220410_20220419_02_T2<br>LC08_L1TP_152005_20220804_20220818_02_T1 | LC08_L1TP_129010_20220515_20220519_02_T1<br>LC08_L1TP_123009_20220318_20220322_02_T1<br>LC08_L1TP_122008_20210527_20210607_02_T1<br>LC08_L1TP_139008_20210331_20210409_02_T1<br>LC08_L1TP_130008_20200617_20200823_02_T1<br>LC08_L1TP_146007_20210401_20210409_02_T1<br>LC08_L1TP_126008_20220611_20220617_02_T1<br>LC08_L1TP_124009_20200911_20200919_02_T1<br>LC08_L1TP_124010_20220410_20220419_02_T1<br>LC08_L1TP_144008_20200923_20201006_02_T1 |

**Table S5: List of Landsat-8 scenes used in the sensitivity test.**

40

45

|             | $\frac{\partial \text{SIC}}{\partial \text{NDSI}} [\%]$ | $\frac{\partial \text{SIC}}{\partial \rho_5} [\%]$ |
|-------------|---------------------------------------------------------|----------------------------------------------------|
| Sensitivity | -0.64                                                   | -36.95                                             |

**Table S6: Sensitivities computed numerically over all 480 scenes.**

| Region               | Sensitivity                                             |                                                    |
|----------------------|---------------------------------------------------------|----------------------------------------------------|
|                      | $\frac{\partial \text{SIC}}{\partial \text{NDSI}} [\%]$ | $\frac{\partial \text{SIC}}{\partial \rho_5} [\%]$ |
| Baffin Bay           | -0.81                                                   | -53.43                                             |
| Barents Sea          | -0.52                                                   | -43.21                                             |
| Beaufort Sea         | -0.50                                                   | -20.21                                             |
| Bering Sea           | -2.83                                                   | -58.45                                             |
| Canadian Archipelago | -0.13                                                   | -16.34                                             |
| Central Arctic       | -0.41                                                   | -37.24                                             |
| Chukchi Sea          | -0.16                                                   | -29.72                                             |
| E. Greenland Sea     | -0.84                                                   | -42.95                                             |
| E. Siberian Sea      | -0.03                                                   | -35.53                                             |
| Hudson Bay           | -1.33                                                   | -35.61                                             |
| Kara Sea             | -0.76                                                   | -28.85                                             |
| Laptev Sea           | -0.14                                                   | -41.74                                             |

50 **Table S7: Sensitivities computed numerically over each sub-region.**

| Cloud contamination category | Sensitivity                                             |                                                    |
|------------------------------|---------------------------------------------------------|----------------------------------------------------|
|                              | $\frac{\partial \text{SIC}}{\partial \text{NDSI}} [\%]$ | $\frac{\partial \text{SIC}}{\partial \rho_5} [\%]$ |
| C1                           | -2.22                                                   | -42.74                                             |
| C2                           | -0.03                                                   | -33.02                                             |
| C3                           | -0.14                                                   | -44.31                                             |
| C4                           | -0.03                                                   | -26.82                                             |

**Table S8: Sensitivities computed numerically for each cloud contamination category.**

| SIC sub-range [%] | Sensitivity                                            |                                                   |
|-------------------|--------------------------------------------------------|---------------------------------------------------|
|                   | $\frac{\partial \text{SIC}}{\partial \text{NDSI}}$ [%] | $\frac{\partial \text{SIC}}{\partial \rho_5}$ [%] |
| 0-10              | -0.08                                                  | -7.64                                             |
| 10-20             | -0.81                                                  | -144.01                                           |
| 20-30             | -1.06                                                  | -230.27                                           |
| 30-40             | -1.26                                                  | -265.66                                           |
| 40-50             | -1.44                                                  | -276.95                                           |
| 50-60             | -1.22                                                  | -297.54                                           |
| 60-70             | -0.93                                                  | -274.00                                           |
| 70-80             | -0.69                                                  | -240.84                                           |
| 80-90             | -0.39                                                  | -149.76                                           |
| 90-100            | -0.02                                                  | -12.82                                            |

**Table S9: Sensitivities computed numerically over each SIC sub-range.**

### S6 Landsat-8 SIC Dataset

| Sub-region   | Cloud Contamination Category | Mean SIC [%] | Std. SIC [%] | $N_{\text{scene}}$ | $N_{\text{pixel}}$ |
|--------------|------------------------------|--------------|--------------|--------------------|--------------------|
| Baffin Bay   | C1                           | 69.59        | 43.27        | 727                | 76301              |
|              | C2                           | 92.63        | 20.85        | 68                 | 9441               |
|              | C3                           | 47.53        | 44.54        | 886                | 183815             |
|              | C4                           | 56.71        | 42.8         | 626                | 117085             |
| Barents Sea  | C1                           | 50.15        | 47           | 258                | 40845              |
|              | C2                           | 97.3         | 10.66        | 6                  | 1086               |
|              | C3                           | 26.21        | 41.02        | 244                | 72665              |
|              | C4                           | 24.77        | 40           | 123                | 28844              |
| Beaufort Sea | C1                           | 89.83        | 26.06        | 194                | 37323              |
|              | C2                           | 99.25        | 5.63         | 21                 | 6598               |
|              | C3                           | 75.58        | 36.89        | 101                | 28933              |
|              | C4                           | 91.51        | 21.33        | 94                 | 26529              |
| Bering Sea   | C1                           | 57.4         | 46.82        | 152                | 20114              |
|              | C2                           | 96.29        | 9.83         | 19                 | 3303               |



|                  |    |       |       |      |        |
|------------------|----|-------|-------|------|--------|
|                  | C3 | 28.45 | 42.12 | 234  | 59792  |
|                  | C4 | 53.24 | 45.55 | 179  | 45355  |
| Canadian A       | C1 | 97.86 | 12.13 | 1537 | 291922 |
|                  | C2 | 99.65 | 4.18  | 142  | 19808  |
|                  | C3 | 84.52 | 32.78 | 819  | 204867 |
|                  | C4 | 89.99 | 27.19 | 540  | 149110 |
| Central Arctic   | C1 | 88.03 | 29.91 | 1132 | 179148 |
|                  | C2 | 99.67 | 2.9   | 40   | 7688   |
|                  | C3 | 88.12 | 27.51 | 646  | 142530 |
|                  | C4 | 86.35 | 28.5  | 385  | 68150  |
| Chukchi Sea      | C1 | 88.89 | 29.61 | 144  | 30839  |
|                  | C2 | 97.9  | 8.31  | 31   | 5604   |
|                  | C3 | 49.51 | 46    | 127  | 37332  |
|                  | C4 | 81.48 | 35.39 | 106  | 27544  |
| E. Greenland Sea | C1 | 73.07 | 40.78 | 641  | 84769  |
|                  | C2 | 97.02 | 7.71  | 26   | 5717   |
|                  | C3 | 55.13 | 44.91 | 353  | 83192  |
|                  | C4 | 66.98 | 41.96 | 301  | 70497  |
| E. Siberian Sea  | C1 | 95.09 | 19.67 | 227  | 50554  |
|                  | C2 | 99.44 | 5.81  | 38   | 9864   |
|                  | C3 | 72.91 | 41.4  | 136  | 40397  |
|                  | C4 | 86.24 | 31.87 | 132  | 37685  |
| Hudson Bay       | C1 | 78.39 | 38.99 | 565  | 84843  |
|                  | C2 | 96.28 | 11.38 | 106  | 10182  |
|                  | C3 | 43.8  | 45.67 | 348  | 96689  |
|                  | C4 | 53.92 | 46.32 | 385  | 105082 |
| Kara Sea         | C1 | 86.79 | 31.7  | 448  | 87498  |
|                  | C2 | 99.22 | 5.93  | 31   | 4681   |
|                  | C3 | 53.49 | 45.41 | 236  | 68225  |
|                  | C4 | 65.42 | 44.35 | 125  | 36858  |
| Laptev Sea       | C1 | 86.22 | 32.04 | 311  | 61149  |
|                  | C2 | 97.57 | 10.45 | 21   | 5658   |
|                  | C3 | 53.34 | 47.14 | 159  | 35842  |
|                  | C4 | 77.42 | 38.06 | 127  | 32446  |

60 **Table S10: The mean and the standard deviation of Landsat-8 SIC during the study period and the number of Landsat-8 scenes used for SIC production ( $N_{\text{scene}}$ ) and the number of Landsat-8 SIC pixels produced ( $N_{\text{pixel}}$ ) over the twelve sub-regions for the four cloud contamination categories.**

## S7 Evaluation of Ice And Open Water Classification Over Cloud Pixels

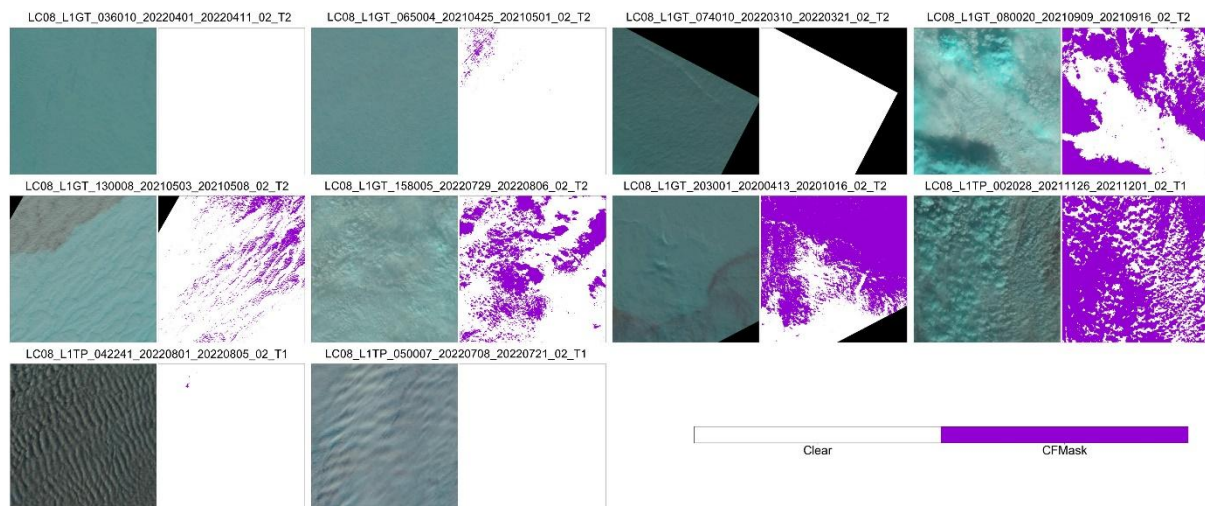

65 **Figure S3:** The (left panel) True-color image and (right panel) estimated cloud mask from CFMask over 10 scenes used for evaluation of SICs produced under C1. Cloud pixels detected by CFMask are shown as purple colour pixels. Cloud pixels undetected by CFMask are shown as black colour pixels. Fill values are shown as black colour pixels. The true-color images were downloaded from United States Geological Survey Earth Explorer The true-color images were downloaded from United States Geological Survey Earth Explorer (<https://earthexplorer.usgs.gov/>, last access: May 22, 2024).

70

| Region                   | Filename                                 |
|--------------------------|------------------------------------------|
| Canadian Archipelago     | LC08_L1GT_036010_20220401_20220411_02_T2 |
| Central Arctic           | LC08_L1GT_065004_20210425_20210501_02_T2 |
| Beaufort Sea             | LC08_L1GT_074010_20220310_20220321_02_T2 |
| Bering Sea               | LC08_L1GT_080020_20210909_20210916_02_T2 |
| Laptev Sea               | LC08_L1GT_130008_20210503_20210508_02_T2 |
| Kara Sea                 | LC08_L1GT_158005_20220729_20220806_02_T2 |
| Barents Sea              | LC08_L1GT_203001_20200413_20201016_02_T2 |
| Baffin Bay Labrador Seas | LC08_L1TP_002028_20211126_20211201_02_T1 |
| East Greenland Sea       | LC08_L1TP_042241_20220801_20220805_02_T1 |
| Canadian Archipelago     | LC08_L1TP_050007_20220708_20220721_02_T1 |

**Table S11:** List of Landsat-8 scenes used to evaluate SICs produced under C1.
